# Supplementary material for: Phylogeographic Aspects of Bat Lyssaviruses in Europe: A Review
Source: Preprints.org preprint supplement (doi:10.20944/preprints202305.1620.v1), 2023-05-23
Supplement: Supplementary file 3 [file supplementary]

Table S1. Complete nucleoprotein (N) lyssavirus genome reference sequences from GenBank used in the analysis. Virus names are: classical rabies virus (RABV), Lyssavirus Aravan (ARAV), Lyssavirus australis (ABLV), Lyssavirus Bokeloh (BBLV), Lyssavirus Duvenhage (DUVV), Lyssavirus Hamburg (EBLV-1), Lyssavirus Helsinki (EBLV-2), Lyssavirus Gannoruwa (GBLV), Lyssavirus Ikoma (IKOV), Lyssavirus Irkut (IRKV), Lyssavirus Khujand (KHUV), Lyssavirus Lagos (LBV), Lyssavirus Lleida (LLEBV), Lyssavirus Mokola (MOKV), Lyssavirus Shimoni (SHIBV), Kotalahti bat lyssavirus (KBVL), Lyssavirus Caucasicus (WCBV) and Lyssavirus Formosa, which includes Taiwan bat lyssavirus -1 (TWBLV-1) and Taiwan bat lyssavirus-2 (TWBLV-2).

| **Virus species** | **Geographical origin** | **Year** | **Species isolated from** | **GenBank reference** | **Reference** |
| --- | --- | --- | --- | --- | --- |
| RABV | USA | 1986 | Baby Hamster Kidney  cells (BHK-21) | NC_001542 | [1] |
| ARAV | Kyrgyzstan | 2003 | *Myotis blythi* | NC_020808 | [2] |
| ABLV | Australia | 1998 | *Saccolaimus flaviventris* | NC_003243 | [3] |
| BBLV | Germany | 2010 | *Myotis nattererii* | NC_025251 | [4] |
| DUVV | South Africa | 1971 | *Homo sapiens* | NC_020810 | [5] |
| EBLV-1 | Germany | 1968 | *Eptesicus serotinus* | NC_009527 | [6] |
| EBLV-2 | United Kingdom | 2002 | *Homo sapiens* | NC_009528 | [6] |
| GBLV | Sri Lanka | 2015 | *Pteropus giganteus* | NC_031988 | [7] |
| IKOV | Tanzania | 2009 | *Civettictis civetta* | NC_018629 | [8] |
| IRKV | Russia | 2003 | *Murina leucogaster* | NC_020809 | [9] |
| KHUV | Tajikistan | 2003 | *Murina leucogaster* | NC_025385 | [10] |
| LBV | Senegal | 1985 | *Eidolon helvum* | NC_020807 | [5] |
| LLEBV | Spain | 2011 | *Miniopterus schreibersii* | NC_031955 | Unpublished |
| MOKV | France | 1996 | *Felis catus* | NC_006429 | [11] |
| SHIBV | Kenya | 2009 | *Hipposideros commersoni* | NC_025365 | [12] |
| KBVL | Finland | 2017 | *Myotis brandti* | LR994545 | [13] |
| WCBV | Russia | 2003 | *Murina leucogaster* | NC_025377 | [10] |
| TWBLV-1 | Taiwan | 2018 | *Pipistrellus abramus* | ON437590 | [14 |
| TWBLV-2 | Taiwan | 2018 | *Nyctalus plancyi velutinus* | ON437589 | [14] |

1. Tordo, N.; Poch, O.; Ermine, A.; Keith, G.; Rougeon, F. Completion of the rabies virus genome sequence determination: highly conserved domains among the L (polymerase) proteins of unsegmented negative-strand RNA viruses. *Virology*. **1988**, *165*(2), 565–576. https://doi.org/10.1016/0042-6822(88)90600-9
2. Kuzmin, I. V.; Orciari, L.; A.; Arai, Y. T.; Smith, J. S.; Hanlon, C. A.; Kameoka, Y.; Rupprecht, C. E. Bat lyssaviruses (Aravan and Khujand) from Central Asia: phylogenetic relationships according to N, P and G gene sequences. *Virus Res.* **2003**, *97*(2), 65–79. https://doi.org/10.1016/s0168-1702(03)00217-x
3. Gould, A. R.; Kattenbelt, J. A.; Gumley, S. G.; Lunt, R. A. Characterisation of an Australian bat lyssavirus variant isolated from an insectivorous bat. *Virus Res*. **2002,** *89*(1), 1–28. https://doi.org/10.1016/s0168-1702(02)00056-4
4. Freuling, C. M.; Beer, M.; Conraths, F. J.; Finke, S.; Hoffmann, B.; Keller, B.; Kliemt, J.; Mettenleiter, T. C.; Mühlbach, E.; Teifke, J. P.; Wohlsein, P.; Müller, T. Novel lyssavirus in Natterer's bat, Germany. Emerg Infect Dis. 2011, 17(8), 1519–1522. <https://doi.org/10.3201/eid1708.110201>
5. Delmas, O.; Holmes, E. C.; Talbi, C.; Larrous, F.; Dacheux, L.; Bouchier, C.; Bourhy, H. Genomic diversity and evolution of the lyssaviruses. PloS one. 2008, 3(4), e2057. <https://doi.org/10.1371/journal.pone.0002057>
6. Marston, D. A.; McElhinney, L. M.; Johnson, N.; Müller, T.; Conzelmann, K. K.; Tordo, N.; Fooks, A. R. Comparative analysis of the full genome sequence of European bat lyssavirus type 1 and type 2 with other lyssaviruses and evidence for a conserved transcription termination and polyadenylation motif in the G-L 3' non-translated region. J Gen Virol. 2007, 88(Pt 4), 1302–1314. https://doi.org/10.1099/vir.0.82692-0
7. Gunawardena, P. S.; Marston, D. A.; Ellis, R. J.; Wise, E. L.; Karawita, A. C.; Breed, A. C.; McElhinney, L. M.; Johnson, N.; Banyard, A. C.; Fooks, A. R. Lyssavirus in Indian Flying Foxes, Sri Lanka. Emerg Infect Dis. 2016, 22(8), 1456–1459. <https://doi.org/10.3201/eid2208.151986>
8. Marston, D. A.; Ellis, R. J.; Horton, D. L.; Kuzmin, I. V.; Wise, E. L.; McElhinney, L. M.; Banyard, A. C.; Ngeleja, C.; Keyyu, J.; Cleaveland, S.; Lembo, T.; Rupprecht, C. E.; Fooks, A. R. Complete genome sequence of Ikoma lyssavirus. *J Virol*. **2012**, 86(18), 10242–10243. https://doi.org/10.1128/JVI.01628-12
9. Kuzmin, I. V.; Hughes, G. J.; Botvinkin, A. D.; Orciari, L. A.; Rupprecht, C. E. Phylogenetic relationships of Irkut and West Caucasian bat viruses within the Lyssavirus genus and suggested quantitative criteria based on the N gene sequence for lyssavirus genotype definition. *Virus Res*. **2005**, *111*(1), 28–43. https://doi.org/10.1016/j.virusres.2005.03.008
10. Kuzmin, I. V.; Wu, X., Tordo, N.; Rupprecht, C. E. Complete genomes of Aravan, Khujand, Irkut and West Caucasian bat viruses, with special attention to the polymerase gene and non-coding regions. *Virus Res.* **2008**, *136*(1-2), 81–90. https://doi.org/10.1016/j.virusres.2008.04.021
11. Le Mercier, P.; Jacob, Y.; Tordo, N. The complete Mokola virus genome sequence: structure of the RNA-dependent RNA polymerase.  *J Gen Virol.* **1997**, *78* (Pt 7), 1571–1576. https://doi.org/10.1099/0022-1317-78-7-1571
12. Kuzmin, I. V.; Mayer, A. E.; Niezgoda, M.; Markotter, W.; Agwanda, B.; Breiman, R. F.; Rupprecht, C. E. Shimoni bat virus, a new representative of the Lyssavirus genus. *Virus Res*. **2010**, *149*(2), 197–210. https://doi.org/10.1016/j.virusres.2010.01.018
13. Calvelage, S.; Tammiranta, N.; Nokireki, T.; Gadd, T.; Eggerbauer, E.; Zaeck, L. M.; Potratz, M.; Wylezich, C.; Höper, D.; Müller, T.; Finke, S.; Freuling, C. M. Genetic and Antigenetic Characterization of the Novel Kotalahti Bat Lyssavirus (KBLV). *Viruses*. **2021**, *13*(1), 69. https://doi.org/10.3390/v13010069
14. Hu, S. C.; Hsu, C. L.; Lee, F.; Tu, Y. C.; Chen, Y. W.; Chang, J. C.; Hsu, W. C. Novel Bat Lyssaviruses Identified by Nationwide Passive Surveillance in Taiwan, 2018-2021. *Viruses*. **2022**, **14**(7), 1562. https://doi.org/10.3390/v14071562
